# Supplementary material for: Galectin-9 regulates the threshold of B cell activation and autoimmunity
Source: eLife. 2021 Aug 9;10:e64557. doi: 10.7554/eLife.64557 (PMC8352593; doi:10.7554/eLife.64557)
Supplement: Source data 1. [file elife-64557-data1.xlsx]

## Sheet: Figure 1 
	1B) gMFI of pTyr expression in B cells stimulated with varrying concentrations of anti-IgM F(ab')2
	[anti-IgM F(ab')2] (ng/mL)	WT										Gal9KO
	0	113	117	120	117	132	113	119	101	120	123	113	115	120	114	110	111	114	97	114	118
	5	183	169	164	172	194	167	175	149	173	182	407	441	373	407	460	395	414	352	415	430
	50	584	489	454	509	575	494	518	440	506	538	948	820	791	786	889	963	866	736	853	901
	500	2046	2883	2753	2894	2210	2867	2609	2218	2703	2713	4148	4121	4123	4131	4668	4007	4200	3570	4208	4368
	5000	3799	3735	3761	3765	4254	3652	3828	3254	3832	3981	5377	5064	4724	5055	5712	4903	5139	4368	5100	5345
	1F) % CD86+
	[anti-IgM F(ab')2] (ng/mL)	WT										KO
	50000	100	100	100	100	100	100	100	100	100	100	100	100	100	100	100	100	100	100	100	100
	1000	99.28	99.15	99.38	92.33	94.19	93.42	96.29	89.55	98.22	94.27	99.69	99.56	99.79	92.71	94.58	93.8	96.69	89.92	98.62	94.66
	500	91.05	94.73	91.14	84.67	89.99	85.67	89.54	83.27	91.33	87.66	99.38	99.25	99.48	92.43	94.29	93.51	96.39	89.64	98.32	94.37
	100	79.04	82.25	79.12	73.51	78.13	74.38	77.74	72.3	79.29	76.11	99.28	99.15	99.38	92.33	94.19	93.42	96.29	89.55	98.22	94.27
	75	66.6	69.31	66.67	61.94	65.85	62.67	65.51	60.92	66.82	64.13	98.87	98.74	98.97	91.95	93.8	93.03	95.89	89.18	97.81	93.88
	50	40.75	42.43	40.8	37.9	44.31	38.35	40.76	37.9	41.57	39.9	94.44	98.25	94.53	87.83	93.34	88.86	92.88	86.37	94.73	90.92
	25	29.82	36.07	29.87	33.74	29.52	28.07	31.18	29	31.81	30.53	91.05	94.73	91.14	84.67	89.99	85.67	89.54	83.27	91.33	87.66
	10	15.11	19.78	15.14	16.05	14.99	14.23	15.88	14.77	16.2	15.55	79.04	82.25	79.12	73.51	78.13	74.38	77.74	72.3	79.29	76.11
	5	8.49	11.9	8.52	7.9	8.45	8.01	8.88	8.26	9.06	8.69	66.6	69.31	66.67	61.94	65.85	62.67	65.51	60.92	66.82	64.13
	2.5	4.29	4.53	9.32	3.99	4.31	4.06	5.08	4.73	5.19	4.98	40.75	42.43	40.8	37.9	44.31	38.35	40.76	37.9	41.57	39.9
	1	0.94	1.05	0.96	0.88	0.99	0.9	0.95	0.89	0.97	0.93	14.29	16.53	19.32	15.99	19.31	15.06	16.75	15.58	17.09	16.4
	0.0025	0.03	0.1	0.05	0.03	0.1	0.05	0.06	0.06	0.06	0.06	0.23	0.1	0.25	0.24	0.1	0.26	0.2	0.18	0.2	0.19
		1G) EC50
		WT	KO
		47.99	3.214
		70.72	2.856
		57.44	3.071
		53.68	3.933
		47.78	3.082
		55.39	3.821
		55.5	3.33
		54.33	3.26
		56.61	3.4
		49.4	2.96

## Sheet: Figure 1 - figure supplement 1
	1B) gMFI Nur77-eGFP
	100 ng/mL		500 ng/mL		1000 ng/mL		5000 ng/mL
	WT	Gal9KO	WT	Gal9KO	WT	Gal9KO	WT	Gal9KO
	2801	5152	4719	7905	5880	10304	7291	11656
	2489	5742	4415	8586	6455	10663	7791	12392
	2171	6235	4098	8682	6253	10343	7861	11257
	2398	5554	4408	8802	6774	11803	8220	11559
	2538	5641	4685	9168	6675	9899	8043	10476
	2509	5706	4805	8728	6613	10999	8104	10344

## Sheet: Figure 1 - figure supplement 2
	1A) gMFI extracellular Gal9
	Subcapsular sinus Macrophages	Macrophages	Monocytes	Ly6C+ inflammatory Monocytes	NK cells	DCs	Neutrophils	CD4 T cells	CD8 T cells	Follicular B cells	Marginal zone B cells
	8675	9641	11371	25926	5370	1703	6797	308	310	3912	10187
	7523	10438	9513	20126	5365	1503	6089	570	532	3772	9172
	7149	11521	10538	16891	5832	1354	7521	769	701	2383	5923
	8015	13161	14180	22857	5537	1649	5665	642	608	2928	7953
	7967	10171	9887	20945	5692	1533	6708	305	305	3830	9513
	7075	10601	9048	19744	4945	1408	5774	570	514	3817	8753
	6996	10926	12324	15777	4335	1390	7236	767	690	2396	5996
	7639	12687	11839	23475	5286	1632	5624	654	611	2996	7886
	7689	13185	15637	22709	6486	1629	5495	648	626	2998	8120
	7914	13750	13280	21709	5975	1608	5416	649	623	2949	7859
	1B) gMFI intracellular Gal9
	Subcapsular sinus Macrophages	Macrophages	Monocytes	Ly6C+ inflammatory Monocytes	NK cells	DCs	Neutrophils	CD4 T cells	CD8 T cells	Follicular B cells	Marginal zone B cells
	12367	12055	9640	15561	9275	6202	14962	1095	1104	2773	5116
	16149	13120	11254	19097	12492	7184	12665	1162	1148	3593	6279
	11561	9754	10632	16303	8674	4756	12199	681	643	3037	5400
	14853	13078	12754	17597	9290	7066	12980	731	700	3513	5885
	12475	11930	11445	17741	8545	6131	13627	1081	1135	2777	5233
	16554	13272	12352	20202	12579	6990	12562	1139	1195	3629	6175
	10894	9808	11474	17666	8397	5010	12109	692	637	3034	5327
	14714	12640	13600	17874	8940	6847	12746	735	697	3549	5885
	15137	13043	12357	17607	9188	7149	13163	717	694	3442	5788
	14936	12148	13548	19900	10145	7128	13151	721	683	3542	6185
	1C) Relative contribution of Gal9
	Subcapsular sinus Macrophages	Macrophages	Monocytes	Ly6C+ inflammatory Monocytes	NK cells	DCs	Neutrophils	CD4 T cells	CD8 T cells	Follicular B cells	Marginal zone B cells
	17044	11715.8	4202.2	4563.57	9519.25	12331.8	14360.9	22728.6	10308.1	296814	69628.6
	26039.2	14370.4	5814.76	5491.22	19464.1	16331.6	21192	30829.6	13524	288708	103985
	19084.2	17871	8891.4	8962.38	13055.4	11242.4	21889.2	23345	9018.24	198914	82091.8
	58084.7	37521.8	23432.6	24676.9	31433.2	24314.8	65443.9	24988.6	9836.16	208044	88286.4
	15331.5	11934.5	4266.4	4642.32	9538.79	11112.8	13014.4	23423.4	10454.4	294672	70485.9
	23156.4	14801.3	5136	5592.44	18925.9	15872.2	20536.3	30078.4	13911.3	292628	96882.7
	21110.2	19697.3	10233.1	9698.47	11204.2	12416	22246.8	23344	8957.25	201996	86960.6
	53870.7	35964.3	19842.4	24809.4	31297.2	21960.6	60621	25279.8	9744.6	207476	92265.7
	57978	38030.6	26594.3	26608.6	36050.2	23700.6	65676.2	24706.5	9834	204792	92349.1
	59867	33926.4	24145.2	27878	34496.8	24460.8	62013.8	23975	9429.32	212905	91566.9
	1D) Fold change in:
	CD64+ F4/80+ Macrophages		Monocytes		CD169+ SCS Macrophages		Ly6C+ Monocytes
	Clodronate Liposome	Control Liposome	Clodronate Liposome	Control Liposome	Clodronate Liposome	Control Liposome	Clodronate Liposome	Control Liposome
	0.46	1.19	0.46	1.19	0.23	0.7	0.46	1.28
	0.5	1.02	0.5	1.02	0.33	1.11	0.77	1.36
	0.5	0.93	0.5	0.93	0.36	1.07	0.51	0.98
	0.57	0.76	0.57	0.76	0.3	0.94	1.24	0.93
	0.54	1.07	0.54	1.07	0.21	1.02	0.38	0.57
	0.44	1.08	0.44	1.08	0.23	0.7	0.57	0.95
	0.5	0.93	0.5	0.93	0.3	1.25	0.62	0.82
	0.51	0.93	0.51	0.93	0.37	1.14	0.75	1.17
	0.57	0.96	0.57	0.96	0.34	1.13	0.88	1.31
	0.53	1.12	0.53	1.12	0.23	0.94	0.44	0.63
	1E) gMFI Gal9 expression on Fol B cells
	Control		Chlodronate Liposomes		B cell deficient
	Endogenous	Gal9KO	Endogenous	Gal9KO	Endogenous	Gal9KO
	2672	2125	1981	907		636
	2509	2709	1862	969		629
	2446	2705	1572	851		633
	2384	2381	1387	724		682
	2613	2636	1231	638		728
	2668	2293	1940	931		753
	2492	2687	1864	957		844
	2436	2695	1573	834		895
	2371	2381	1385	715		866
	2440	2858	1228	630		976
	1F) gMFI Gal9 expression on MZ B cells
	Control		Chlodronate Liposomes		B cell deficient
	Endogenous	Gal9KO	Endogenous	Gal9KO	Endogenous	Gal9KO
	3133	2706	3935	2513		908
	4535	4066	3297	1468		959
	4321	3848	3077	1272		948
	4294	3343	2614	1087		983
	3749	2361	2101	936		1047
	3128	1605	3980	2419		1084
	4529	3854	3263	1487		1206
	4343	3885	3018	1256		1383
	4308	3567	2610	1045		1289
	3973	2834	2172	938		1496
	1G) % of Max CD86+ B cells
	Recipient:	Control Liposomes																				Clondronate Liposomes																				B cell deficient
	[F(ab')2] (ng/mL)	Endogenous										Gal9KO										Endogenous										Gal9KO										Gal9KO
	50000	100	100	100	100	100	100	100	100	100	100	100	100	100	100	100	100	100	100	100	100	100	100	100	100	100	100	100	100	100	100	100	100	100	100	100	100	100	100	100	100	100	100	100	100	100	100	100	100
	1000	100	94.9	94.9	97.8	93	94	96.9	95.5	97	95.5	94.9	93.6	95	93.6	92.9	92.1	92.1	95.7	95	93.6	92.9	92.1	92.1	95.7	95	93.6	95	94.9	93.6	95.8	101	95.9	95.9	98.8	94	95	97.9	96.5	98	96.5	97.5	99	97.5	96.8	95.9	95.9	99.7	99
	500	90.5	89.4	89.4	90	85.3	86.3	88.7	87.6	88.8	87.6	95.7	94.5	95.8	94.5	93.9	93	93	96.7	96.6	94.5	93.9	93	93	96.7	96.6	94.5	95.8	95.7	94.5	97	97.6	96.5	96.5	97	92.1	93	95.7	94.5	95.8	94.5	96.5	97.8	96.5	95.9	95	95	98.7	98.6
	100	78.3	77.4	77.4	77.8	73.8	74.6	76.8	75.8	76.8	75.8	87.7	86.7	87.8	86.7	86.1	85.3	85.3	88.6	88.6	86.7	86.1	85.3	85.3	88.6	88.6	86.7	87.8	87.7	86.7	89	97.6	96.5	96.5	97	92.1	93	95.7	94.5	95.8	94.5	96.5	97.8	96.5	95.9	95	95	98.7	98.6
	75	65.1	64.3	64.3	64.7	61.4	62	63.8	63	63.9	63	68.8	68	68.8	68	67.5	66.9	66.9	69.5	69.5	68	67.5	66.9	66.9	69.5	69.5	68	68.8	68.8	68	69.8	95.6	94.5	94.5	95	90.1	91.1	93.7	92.6	93.8	92.6	93.6	94.8	93.6	92.9	92.1	92.1	95.7	95.6
	50	40	43.5	43.5	41	37.8	39.4	40	39.3	39.9	39.3	42	41.2	41.9	41.2	42.2	41.4	41.4	42.3	42.6	41.2	42.2	41.4	41.4	42.3	42.6	41.2	41.9	42	41.2	43	91	98.9	98.9	93.2	86.1	89.7	91	89.3	90.8	89.3	91.3	92.8	91.3	93.5	91.7	91.7	93.7	94.4
	25	30.6	30.3	30.3	31.6	30.3	31.2	31.7	31.4	31.7	31.4	32.7	32.4	32.7	32.4	33.2	32.2	32.2	33.2	34.2	32.4	33.2	32.2	32.2	33.2	34.2	32.4	32.7	32.7	32.4	32.6	80.3	79.5	79.5	83	79.4	82	83.2	82.4	83.2	82.4	86.4	87.2	86.4	88.4	85.9	85.9	88.6	91.2
	10	14.3	14.2	14.2	14.8	14.2	14.3	14.7	14.7	14.8	14.7	18.6	18.6	18.8	18.6	19.1	18.1	18.1	19.1	19.7	18.6	19.1	18.1	18.1	19.1	19.7	18.6	18.8	18.6	18.6	18.7	59.9	59.5	59.5	62.1	59.6	59.9	61.8	61.8	62.4	61.8	67.7	68.3	67.7	69.3	65.6	65.6	69.5	71.6
	5	7.7	7.6	7.6	7.9	7.6	7.3	7.7	7.9	7.9	7.9	8.7	8.8	8.9	8.8	9	8.2	8.2	9.1	9.3	8.8	9	8.2	8.2	9.1	9.3	8.8	8.9	8.7	8.8	8.9	40.2	40	40	41.6	39.7	38.4	40.6	41.2	41.6	41.2	47.1	47.6	47.1	48.3	43.9	43.9	48.3	49.7
	2.5	4.2	4.2	4.2	4.7	4.6	4.1	5.1	4.9	4.9	4.9	6.2	5.9	5.9	5.9	6.5	4.9	4.9	5.9	6.5	5.9	6.5	4.9	4.9	5.9	6.5	5.9	5.9	6.2	5.9	5.6	16	16.1	16.1	17.8	17.7	15.4	19.6	18.8	18.5	18.8	24.7	24.4	24.7	27.2	20.3	20.3	24.8	27.2
	1	1	1	1	1	1	1	1	1	1	1	2	2.1	2	2.1	2.3	1.9	1.9	2.1	2	2.1	2.3	1.9	1.9	2.1	2	2.1	2	2	2.1	2	6.9	7.3	7.3	7	6.7	6.8	6.9	7.3	7.1	7.3	11.4	11.1	11.4	12.7	10.7	10.7	11.3	11.2
	0.0025	0	0.1	0.1	0.1	0.1	0.1	0.1	0.1	0	0.1	0.1	0.1	0	0.1	0	0.1	0.1	0.1	0.1	0.1	0	0.1	0.1	0.1	0.1	0.1	0	0.1	0.1	0.1	0	0.1	0.1	0.1	0.1	0.1	0.1	0.1	0	0.1	0.1	0	0.1	0	0.1	0.1	0.1	0.1
	1H) EC50 anti-IgM Titration
	Control Lipsomes		Clondronate Liposomes		B cell deficient
	Endogenous	Gal9KO	Endogenous	Gal9KO	Endogenous	Gal9KO
	51.71	49.94	43.62	13.25		5.45
	48.59	47.18	44.14	17.01		5.488
	48.59	46.93	40.34	13.01		5.45
	50.12	48.18	44.16	14.12		5.097
	52.87	50.92	43.14	12.19		5.963
	51.09	47.46	38.17	12.54		5.963
	50.82	52.46	44.58	11.97		5.39
	51.33	49.48	42.69	10.77		5.018
	50.83	48.41	39.12	11.81		5.45
	51.33	47.18	41.42	9.77		5.488
[truncated: 2 more columns]

## Sheet: Figure 2
	2B) Cell contact area							2C) Antigen accumulation							2G) IgM Internalization rate
	WT			Gal9KO				WT			Gal9KO				HEL (5 ug/mL)		QEL (5 ug/mL)		DEL (5 ug/mL)		HEL (0.5 ug/mL)
	HEL	QEL	DEL	HEL	QEL	DEL		HEL	QEL	DEL	HEL	QEL	DEL		WT	KO	WT	KO	WT	KO	WT	KO
	19.99	20.72	17.5	32.35	22.59	17.48		9765	10115	8572	15691	11012	8562		0.2465	0.4149	0.2045	0.2743	0.1342	0.2254	0.1096	0.2634
	29.55	15.78	13.53	29.56	28.83	14.4		14348	7747	6668	14353	14003	7085		0.1781	0.3422	0.1582	0.2133	0.0607	0.1687	0.0905	0.2307
	20.39	10.8	13.96	26.07	33.41	18.67		9957	5360	6874	12680	16199	9132		0.219	0.3813	0.1824	0.2463	0.0969	0.1936	0.1049	0.2475
	22.09	19.64	9.85	34.6	15.59	18.31		10772	9597	4904	16769	7656	8960		0.2041	0.3694	0.1766	0.2368	0.0921	0.1935	0.1236	0.2415
	21.85	26.92	18.79	20.68	15.05	29.76		10657	13088	9190	10096	7397	14449		0.2304	0.3946	0.1919	0.2573	0.1081	0.2017	0.118	0.2569
	13.46	23.46	14.87	24.9	15.39	15.52		6635	11429	7311	12119	7560	7622		0.1942	0.3596	0.1691	0.2272	0.082	0.1857	0.0839	0.2363
	15.8	18.62	14.95	19.9	18.8	18.96		7757	9108	7349	9722	9195	9271		0.2121	0.377	0.1805	0.2425	0.0957	0.1948	0.1051	0.2461
	21.37	19.27	9.24	23.82	15.18	19.2		10427	9420	4612	11601	7459	9387		0.1908	0.3393	0.1624	0.2183	0.0861	0.1753	0.0946	0.2214
	15.03	14.55	16.06	19.91	19.81	17.08		7387	7157	7881	9727	9679	8370		0.2227	0.3959	0.1895	0.2547	0.1005	0.2045	0.1103	0.2584
	19.3	19.27	19.42	24.08	20.72	31.65		9434	9420	9492	11726	10115	15355		0.2078	0.3695	0.1768	0.2377	0.0938	0.1909	0.103	0.2411
	22.84	18.03	7.87	15.68	11.77	14.9		11132	8826	3955	7699	5825	7325
	10.41	10.47	10.64	27.94	11.22	14.85		5173	5201	5283	13576	5561	7301
	16.18	14.13	7	24.58	17.45	28.8		7939	6956	3538	11966	8548	13989		2H) % IgM Internalized (20 min)
	21.38	14.93	13.86	19.89	13.37	13.74		10432	7340	6827	9717	6592	6769		HEL (5 ug/mL)		QEL (5 ug/mL)		DEL (5 ug/mL)		HEL (0.5 ug/mL)
	12.32	10.5	12.91	19.82	17.17	17.17		6088	5216	6371	9684	8413	8413		WT	KO	WT	KO	WT	KO	WT	KO
	20	13.5	9.06	21.32	18.67	14.91		9770	6654	4525	10403	9132	7330		89.923	89.9087	61.6497	88.2207	44.3687	59.3642	63.6699	84.9345
	15.72	11.24	11.49	17.46	11.31	20.63		7718	5571	5690	8552	5604	10072		86.3464	86.4151	56.1258	84.9224	35.996	52.895	58.5086	82.4867
	25.17	19.2	13.33	23.51	21.47	16.83		12249	9387	6572	11453	10475	8250		88.6814	88.6807	59.0824	87.0276	40.7803	57.359	61.6726	83.4841
	12.12	23.92	17.05	35.25	16.23	14.81		5992	11649	8356	17081	7963	7282		87.9036	87.9189	58.4025	86.3679	39.5814	55.5681	61.2835	83.2785
	13.89	28.75	14.58	19.65	15.67	11.81		6841	13965	7172	9602	7694	5844		89.1055	89.122	60.0519	87.4382	41.976	58.2698	57.0986	84.2907
	16.66	19.97	17.73	18.96	24.12	16.71		11299	9756	8682	9271	11745	8193		87.4106	87.4304	57.581	85.8327	38.3866	54.6215	64.6704	82.9212
	15.9	19.83	19.09	20.33	20.26	25.67		8169	9689	9334	9928	9895	12488		88.2284	88.246	58.8156	86.6349	40.1815	56.3463	61.1506	83.566
	10.23	16.95	20.1	15.52	13.91	17.2		7805	8308	9818	7622	6851	8428		79.4056	79.4214	52.934	77.9714	36.1634	50.7116	55.0355	75.2094
	19.03	17.92	12.75	23.22	18.29	20.85		5086	8773	6294	11314	8950	10178		92.6398	92.6583	61.7563	90.9667	42.1906	59.1636	64.2081	87.7442
	12.41	10.04	11.03	22.83	24.07	18.59		9305	4995	5470	11127	11721	9094		86.4638	86.481	57.6392	84.9022	39.3779	55.2193	59.9276	81.8946
	20.59	21.05	18.27	22.04	20.61	20.84		6131	10273	8941	10748	10062	10173
	18.46	16.8	14.96	16.55	17.3	14.58		10053	8236	7354	8116	8476	7172
	18.21	16.39	17.69	27.32	26.22	16.29		9032	8039	8663	13279	12752	7991		2I) gMFI Lysozyme internalized (20 min)
	12.88	16.27	18.15	16.23	18.74	19.35		10758	7982	8883	7963	9166	9458		HEL (5 ug/mL)		QEL (5 ug/mL)		DEL (5 ug/mL)		HEL (0.5 ug/mL)
	20.67	12.92	14.84	31.81	18.64	27.36		11376	6376	7296	15432	9118	13298		WT	KO	WT	KO	WT	KO	WT	KO
	18.04	9.78	15.32	32.5	22.16	21.55		16530	4871	7526	15763	10806	10513		5424	5542	3840	5181	2210	3783	2532	4140
	12.58	18.06	22.46	19.03	25.72	29.99		8912	8840	10949	9305	12512	14559		5578	5530	3819	5028	2258	3438	2515	4158
	13.06	16.63	23.45	27.26	18.62	13.07		6357	8154	11424	13251	9108	6448		5484	5455	3877	5206	2135	3897	2537	4176
	18.43	22.24	19.7		18.44	18.1		10091	10844	9626		9022	8859		5722	5736	4004	5350	2292	3483	2632	3832
	14.35	10.98	15.83		17.7	23.64		8830	5446	7771		8667	11515		5172	5185	3619	4836	2072	3538	2379	3979
	14.12	15.68	12.97		27.64	23.46		6213	7699	6400		13433	11429		5770	5784	4038	5395	2311	3697	2654	4254
	14.06	14.04	14.56		23.17	31.03		6443	6913	7162		11290	15058		5525	5539	3866	5166	2213	3639	2542	4090
	11.56	12.25	10.21		21.88	17.74		9017	6055	5077		10671	8687		4973	4985	3480	4649	1992	3275	2287	3681
	18.88	16.41	20.93		29.57	22.39		7061	8049	10216		14358	10916		5801	5816	4059	5424	2324	3821	2669	4294
	9.77	20.79	13.95		19.98	25.77		13998	10149	6870		9760	12536		5415	5428	3789	5063	2169	3567	2491	4008
	15.74	18.98	15.04		19.38	13.87		6951	9281	7392		9473	6831
	9.64	10.28	19.7		17.57	17.03		6922	5110	9626		8605	8346
	13.85	14.14	13.2		35.42	17.18		5724	6961	6510		17162	8418
	15.37	15.87	26.53		20.83	23.84		9233	7790	12901		10168	11611
	23.89	16.55	12.41		20.03	15.61		4866	8116	6131		9784	7665
	17.64	14.98	13.35		29.52	14.85		7728	7363	6582		14334	7301
	13.27	11.05	8.98		15.68	20.42		4803	5479	4487		7699	9971
	18.28	14.3	10.73		28.14	16.83		6822	7037	5326		13672	8250
	15.59	19.78	9.76		22.91	23.07		7550	9665	4861		11165	11242
	11.08	19.09	9.3		20.07	21.7		11635	9334	4640		9804	10585
	20.55	18.7	9.68		19.91	16.81		8639	9147	4823		9727	8241
	27.43	20.69	11.15		19.2	17.23		6544	10101	5527		9387	8442
	11.09	13.95	13.36		19.53	17.93		8945	6870	6587		9545	8778
		12.95	16.31		19.78	19.98			6390	8001		7037	9760
		12.17	13.35		19.09	12.54			6016	6582		9665	6194
		15.57	11.16		18.7	18.78			7646	5532		9334	9185
		18.45	9.72		20.69	12.41			9027	4842		9147	6131
		15.62	15.27		13.95	13.35			7670	7502		10101	6582
		21.31	10.69		12.95	8.98			10398	5307		6870	4487
		13.93	10.08		12.17	10.73			6860	5014		6390	5326
		16.41	18.52		15.57	9.76			8049	9061		6016	4861
		22.49	21.56		18.45	9.3			10964	10518		7646	4640
		19.61			15.62	9.68			9583			9027	4823
		20.38			21.31	11.15			9952			7670	5527
		18.36			13.93	13.36			8984			10398	6587
		8.07			16.41	16.31			4051			6860	8001
		20.06			22.49	13.35			9799			8049	6582
		10.54			19.61	11.16			5235			10964	5532
		14.34			20.38	9.72			7057			9583	4842
		13.75			18.36	15.27			6774			9952	7502
		15.72			8.07	10.69			7718			8984	5307
		22.36			20.06	10.08			10901			4051	5014
		20.41			10.54	18.52			9967			9799	9061
		20.15			14.34	21.56			9842			5235	10518
		13.99			13.75				6889			7057
					15.72							6774
					22.36							7718
					20.41							10901
					20.15							9967
					13.99							9842

## Sheet: Figure 2 - figure supplement 1
	2A) gMFI IgM
	0 min								5 min								10 min								15 min								20 min
	HEL (5 ug/mL)		QEL (5 ug/mL)		DEL (5 ug/mL)		HEL (0.5 ug/mL)		HEL (5 ug/mL)		QEL (5 ug/mL)		DEL (5 ug/mL)		HEL (0.5 ug/mL)		HEL (5 ug/mL)		QEL (5 ug/mL)		DEL (5 ug/mL)		HEL (0.5 ug/mL)		HEL (5 ug/mL)		QEL (5 ug/mL)		DEL (5 ug/mL)		HEL (0.5 ug/mL)		HEL (5 ug/mL)		QEL (5 ug/mL)		DEL (5 ug/mL)		HEL (0.5 ug/mL)
	WT	KO	WT	KO	WT	KO	WT	KO	WT	KO	WT	KO	WT	KO	WT	KO	WT	KO	WT	KO	WT	KO	WT	KO	WT	KO	WT	KO	WT	KO	WT	KO	WT	KO	WT	KO	WT	KO	WT	KO
	22840	23030	23495	22977	22268	22597	23611	23625	9508	5874	17481	12674	20339	14266	15042	9502	5567	3533	13206	8636	16135	12362	13775	5455	3797	3041	8530	7728	13608	10673	12045	4157	2678	2703	8513	6583	12207	9873	9220	3831
	22731	22849	23514	23491	23159	23501	23695	23706	9458	5895	17283	12666	19245	14837	16850	9479	5510	3514	13177	8612	16624	12856	13743	5518	3817	2965	8586	7881	14100	11152	11763	4144	2729	2728	8463	6626	12695	10352	9187	3879
	23282	23108	23631	23467	23891	21199	23799	23459	9531	5887	17578	12823	18939	13384	15993	9536	5486	3585	13230	8640	15378	11597	13699	5429	3781	3002	8524	7920	12847	9932	11763	4200	2690	2670	8585	6627	11452	9132	9214	3913
	23691	23738	24518	24273	23017	23357	24473	24364	9891	6128	18167	13246	18101	14746	16496	9898	5749	3690	13749	8985	16547	12778	14099	5693	3955	3126	8899	8166	14022	10076	9380	4339	2810	2812	8872	6885	12618	10276	9380	4034
	21895	21937	22162	21940	22805	21113	22602	22503	8940	5539	16421	11973	19852	13329	17199	8947	5196	3336	12428	8122	15331	11550	13225	5146	3575	2826	8044	7382	12800	9887	8960	3922	2540	2541	8019	6223	11405	9087	9960	3646
	23849	23895	24724	24477	23211	23554	24637	24527	9974	6180	18320	13357	20298	14870	17610	9981	5797	3721	13865	9061	16653	12886	14176	5741	3988	3153	8974	8235	14129	11180	9417	4375	2834	2835	8946	6943	12724	10380	8417	4068
	23048	23093	23674	23438	23059	22554	23803	23697	9550	5917	17542	12790	19462	14239	16532	9557	5551	3563	13276	8676	16111	12338	13786	5497	3819	3019	8593	7885	13584	10483	10555	4190	2714	2715	8566	6648	12184	9850	9230	3895
	21896	21938	22490	22266	21906	21426	22613	22512	9073	5621	16665	12150	18489	13527	15705	9079	5273	3385	12612	8242	15306	11721	13097	5222	3628	2868	8163	7491	12905	9959	10027	3980	2578	2579	8138	6315	11574	9358	8768	3700
	24200	24247	24858	24609	24211	23681	24993	24882	10028	6213	18419	13429	20435	14951	17358	10035	5828	3741	13940	9110	16917	12955	14475	5772	4010	3170	9022	8280	14264	11008	11082	4399	2849	2851	8995	6980	12793	10343	9691	4090
	22587	22631	23201	22969	22597	22102	23327	23223	9359	5799	17191	12534	19073	13954	16201	9366	5440	3492	13010	8502	15789	12091	13510	5387	3742	2958	8421	7728	13313	10274	10344	4106	2659	2661	8395	6515	11940	9653	9045	3817

## Sheet: Figure 3
	3A) Spleen weight			3C) % GC B cells			3E) % ASC			3F) % Long-lived ASC			3H) MFI					3I) anti-dsDNA IgG			3J) anti-GME IgG			3K) IgG containing ICs			3L) Urine Protein
	WT	Gal9 KO		WT	Gal9 KO		WT	Gal9 KO		WT	Gal9 KO		IgM		IgG			WT	Gal9 KO		WT	Gal9 KO		WT	Gal9 KO		WT	Gal9 KO
	0.087	0.737		1.07	1.92		1.85	4.35		27.3	72.5		WT	Gal9 KO	WT	Gal9 KO		74.9	259.3		42.9	235		50.5	174.2		18.1992	50.1806
	0.077	0.682		0.93	1.65		1.56	4.935		28.8	56.3		8080000000	23200000000	8080000000	23200000000		123.1	163.2		18.3	484.5		66.9	96.3		47.3342	90.3859
	0.185	0.823		0.82	1.86		1.545	3.45		25.1	45.6		8210000000	19000000000	8210000000	19000000000		99.4	164.1		211.4	418.1		55.5	79.1		21.8542	108.661
	0.15	0.421		1.03	1.79		1.95	3.75		15.1	64.6		13500000000	23300000000	13500000000	23300000000		80.2	212.1		28.8	340.7		75	124		33.0888	145.211
	0.083	0.951		1.04	1.65		1.69	5.55		11.5	58.7		24100000000	16900000000	24100000000	16900000000		36.7	159.5		243	214.1		71.1	116.9		16.3717	62.9732
	0.093	0.79		0.91	1.59		1.72	4.33		21.56	40.1		15600000000	25400000000	15600000000	25400000000		80.8	151.3		30.6	267		43.7	150.2		8.14786	81.2483
	0.143	0.661		0.87	1.61		1.565	4.455		19.62	58.5		12700000000	31500000000	12700000000	31500000000		35.5	203.9		381.9	246.1		71.5	161.1		20.0267	95.8684
	0.098	0.567		1	1.78		1.495	2.69		18.76	56.61		11900000000	20800000000	11900000000	20800000000		60.5	165		13	300.1		118.9	138.1		14.5442	35.5605
	0.103	0.808		0.9	1.65		2.39	5.175		23.72	51.52		15300000000	24500000000	15300000000	24500000000		98.1	121.5		28.8	220.2		101	116.9		22.4458	17.2854
	0.089	0.962		0.85	1.58		1.83	4.95		22.95	49.25		15500000000	21900000000	15500000000	21900000000		62.1	220.3		158.7	263.3		124.2	139.1		20.2013	26.423
	0.157	0.585		0.98	1.76								9410000000	32000000000	9410000000	32000000000		54.3	157.7		66.6	327.1		56.8	118.3
	0.137	0.695		0.89	1.64								13400000000	23850000000	13400000000	23850000000		80.2	195.7		11.8	197.5		79.1	100.5
	0.095	0.556		0.1	0.56								10700000000	19080000000	10700000000	19080000000		55.5	160.4		108.5	351.8		66.4	280.9
	0.115	0.71		0.88	1.62								11400000000	20272500000	11400000000	20272500000		78.4	243.7		135	494.7		122.7	129.5
	0.112	0.689		0.85	1.57								14800000000	26235000000	14800000000	26235000000		49.9	157.7		48.7	280.7		93	113.5
	0.129	0.796		0.98	1.81								12400000000	21942000000	12400000000	21942000000		121.3	277.2		21.5	326.7		127.6	153.6
	0.139	0.86		1.06	1.96								12100000000	21465000000	12100000000	21465000000		95.5	160.4		45.5	273.1		128.5	153.5
	0.108	0.668		0.82	1.52								15200000000	26950500000	15200000000	26950500000		92	206.7		15.6	242.8		102.7	126.9
	0.118	0.732		0.9	1.67								20100000000	35775000000	20100000000	35775000000		84.3	158.6		185.6	613.6		77.8	101
	0.117	0.721		0.89	1.64								11800000000	20988000000	11800000000	20988000000		34.9	172.3		27	232.5		103.6	124.2
													14000000000	24804000000	14000000000	24804000000

## Sheet: Figure 3 - figure supplement 1
	3C) %Tfh cells			3D) %Tfr cells			3E) Tfr/Tfh ratio			3I) % IgMhi			3K) gMFI p-Tyr				3L) anti-HEL IgM
	WT	Gal9KO		WT	Gal9KO		WT	Gal9KO		WT	Gal9KO		WT	Gal9KO IgMlo	Gal9KO IgMhi		MD4		MD4/ML5
	5.02	15.5		1.34	4.64		0.045817	0.046452		2.05	10.9		2129	1842	4611		WT	Gal9KO	WT	Gal9KO
	4.43	14.6		1.32	4.39		0.054176	0.041781		3	14.3		2071	1868	4664		21883	14325	322	4875
	4.57	14.9		0.15	5.02		0.045689	0.04698		3.27	11.5		1967	2496	4436		15675	36310	52	8765
	4.58	14.7		0.99	4.35		0.039301	0.039456		2.3	10.9		2527	1870	5730		6779	28041	59	1925
	3.76	14.8		0.97	4.4		0.047872	0.041216		2.79	14.3		2193	2242	5623		8559	24975	282	4850
	4.23	14.4		0.51	4.74		0.040567	0.047222		3.31	10.8		3049	2245	5142		39430	12065	171	14068
	4.68	15		0.91	4.48		0.034188	0.04		2.79	12.12		2364	3078	5034		22055	8285	270	17638
	5.1	14		1.06	4.58		0.035294	0.044286		3.34	14.54		2083	1832	4531		15708	17156	164	7290
	4.31	14.2		1.02	4.38		0.041763	0.041549		3.15	13.69		2314	1832	4279		13167	18357	147	9000
	4.38	14.2		1.12	4.26		0.047945	0.040845		2.93	12.72		2437	3010	4632		17907	8324	272	3300
	4.04	14.7		0.94	4.41		0.042079	0.040816		2.89	12.57		2503	1862	4883		19160	4922	119	2725
	4.3	14.3		1.86	4.09		0.057322	0.038462											176	14588
																			93	5820

## Sheet: Figure 4
	4B) %B-1a cells			4D) gMFI CD86					4F) %ASC			4G) anti-PC IgM			4I) %B-1 cells			4K) %B-1a cells
	WT	Gal9KO		B-1a cells		B-1b cells			WT	Gal9KO		WT	Gal9KO		WT	Gal9KO		WT	Gal9KO
	38.1	58.5		WT	Gal9KO	WT	Gal9KO		5.47	7.98		318.5	793.5		12.3	29.7		58.5	83.3
	39.5	65.5		1606	2954	1284	1334		4.05	6.46		213.5	1301		9.2	22		61.7	84.6
	35.3	61		1961	3061	1472	1742		4.1	8.32		488.5	1918.5		10.8	27.2		57.7	81.3
	33.9	77.3		1814	2345	1419	1334		5.93	8.08		248.5	1008.5		12.5	24.8		58.9	82.6
	37.6	63.8		1771	2366	1409	1934		3.09	7.83		533.5	751		9.9	26.3		71.7	84.1
	32.8	72.1		1724	2996	1794	1628		4.97	6.4		231	858.5		11.4	27.7		51	81.8
	41.2	64		1375	3007	1324	1822		5.14	6.9		873.5	816		8.6	22.9		59.8	82.3
	28	58.9		1357	2997	1321	1622		5.1	7.1		686	926		7.3	28.3		64.3	81.1
	41.2	73.4		1349	3041	1618	1592		4.21	8.21		428.5	763.5		10.2	26.1		70	74.2
	44.4	59.5		1620	2846	1368	1476		3.23	5.32		413.5	851		10.8	27.4		54.32	88.9
	34.4	59.9		1701	2988	1436	1550		2.56	4.97		202.3	980.8		9.2	23.5		63.4	71.5
	36.6	54.2		1522	2675	1286	1387		2.95	6.06		354.3	717.3		9.5	24.3		52.3	93.6
				1733	3045	1463	1579					342	1031
												379.8	1728.5
												276.9	886.5
												298.1	980
												452.3	870.9
												185.2	809.4
												451.7	2173.7
												326	788.5

## Sheet: Figure 4 - figure supplement 1
	4B) gMFI CD69					4D) gMFI MHCII					4F) % Thymic B-1 cells					4G) # Thymic B-1 cells
	B-1a cells		B-1b cells			B-1a cells		B-1b cells			B-1a cells		B-1b cells			B-1a cells		B-1b cells
	WT	Gal9KO	WT	Gal9KO		WT	Gal9KO	WT	Gal9KO		WT	Gal9KO	WT	Gal9KO		WT	Gal9KO	WT	Gal9KO
	206	890	256	277		5999	23277	4963	6018		1.04	3.5	1.2	0.69		5000000	15000000	2000000	2000000
	263	885	287	276		4427	22857	5434	5105		0.2	5.57	0.09	1.58		665885	19000000	3000000	2000000
	246	788	288	274		5807	23185	6904	5085		0.86	4.46	0.8	0.93		7000000	24000000	4000000	8000000
	246	982	289	259		5829	22733	4993	6089		0.55	5.57	0.61	1.22		4000000	40000000	10000000	3000000
	241	836	286	239		5854	31709	4888	4269		1.07	4.78	1.09	1.38		3000000	20000000	6000000	10000000
	190	839	274	240		5546	31880	5267	5300		0.4	4.5	0.13	0.44		756636	30000000	2000000	2000000
	187	822	273	244		5345	30699	4320	4303		0.16	5.07	0.07	1.77		662964	16000000	4000000	852355
	184	830	272	223		6272	33114	6206	6302		0.66	6.13	1.17	1.29		10000000	23000000	8000000	6000000
	220	859	278	254		5635	27432	5372	5309		0.56	4.83	0.87	0.9		8000000	11000000	1000000	5000000
	231	902	292	267		5917	28803	5640	5574		0.66	4.3	1.1	0.3		1000000	35000000	3000000	657502
	207	807	261	239		5297	25786	5050	4990
	236	919	297	272		6029	29352	5748	5680

## Sheet: Figure 5
	5B) %CD86+
		WT										Gal9KO
	F(ab')2 (ng/mL)	B-1a										B-1a
	50000	100	100	100	100	100	100	100	100	100	100	100	100	100	100	100	100	100	100	100	100
	5000	99.73	100.27	99.46	99.82	94.83	90.09	97.37	94.45	97.0025	99.31	99.51	94.53	97.52	97.19	92.33	87.71	94.8	91.95	94.4425	96.69
	500	91.67	91.09	91.38	91.38	86.01	80.9	88.74	86.08	88.4062	90.51	98.74	100.28	99.51	99.51	94.53	89.81	97.06	94.15	96.6987	99
	100	77.58	83.4	85.17	82.06	75.98	70.22	79.07	76.7	78.7725	80.65	98.88	100.43	99.65	99.65	94.67	89.94	97.2	94.29	96.8388	99.15
	50	53.83	52.37	50.86	52.36	49.74	47.24	51.07	49.53	50.875	52.09	96.8	99.57	98.18	98.19	93.27	88.61	95.77	92.9	95.4112	97.69
	5	21.34	23.07	20.78	21.73	20.65	19.62	21.2	20.56	21.1187	21.62	67.29	68.51	67.89	67.9	64.51	61.28	66.23	64.24	65.9813	67.55
	1	11.06	11.54	10.47	11.02	10.48	9.95	10.75	10.43	10.7125	10.97	38.76	34.95	36.87	36.86	35.02	33.27	35.96	34.88	35.8213	36.67
	0.5	4.98	5.58	4.24	4.93	4.25	3.59	4.6	4.46	4.57875	4.69	13.32	23.11	15.2	22.21	19.99	18.99	18.8	18.24	18.7325	19.18
	0.1	0.28	0.33	0.42	0.34	0.31	0.29	0.33	0.32	0.3275	0.33	10.35	10.49	10.42	10.42	8.86	8.42	9.83	9.53	9.79	10.02
	0.05	0.48	0.28	0.07	0.28	0.25	0.24	0.27	0.26	0.26625	0.27	6.28	5.36	5.82	5.82	4.37	4.15	5.3	5.14	5.28	5.41
	0.01	0.28	0.11	0.15	0.18	0.16	0.15	0.17	0.17	0.17125	0.18	3.64	3.11	3.38	3.38	2.53	2.41	3.08	2.98	3.06375	3.14
	0.005	0.09	0.09	0.16	0.12	0.1	0.1	0.11	0.11	0.11	0.11	0.06	0.23	0.14	0.14	0.12	0.11	0.13	0.13	0.1325	0.14
		5C) EC50			5D) gMFI p-Tyr					5E) gMFI Gal9				5F) gMFI CD5				5H) IgM cluster area			5I) IgM Hopkins index			5J) CD5 cluster area			5K) CD5 Hopkins index			5M) Mean CBC			5N) Mean NN
		B-1a cells			WT	Gal9KO	WT	Gal9KO		B-1a	B-1b	B-2		B-1a	B-1b	B-2		B-1a cells			B-1a cells			B-1a cells			B-1a cells			B-1a cells			B-1a cells
		WT	Gal9KO		-	-	+ lactose	+ rGal9		11356	4580	3704		591	72.2	102		WT	Gal9KO		WT	Gal9KO		WT	Gal9KO		WT	Gal9KO		WT	Gal9KO		WT	Gal9KO
		43.2	2.1		12102	17317	16820	12002		12989	5254	4186		543	91.2	100		10636	5679		0.629	0.733		7643	10146		0.951253	0.990155		0.101071	-0.35554		53.51	47.69
		45.1	1.9		12354	18510	15688	11984		9796	3038	4269		498	94.7	80.9		10830	7989		0.604	0.704		6862	9109		0.927398	0.959738		0.127456	-0.30235		22.73	35.48
		35.9	2		12418	17525	18597	12072		11714	4291	3426		544	86	94		16817	7975		0.577	0.673		3266	4336		0.944356	0.972897		0.167671	-0.26323		42.33	84.96
		41.4	1.9		11861	16884	16017	11856		10642	3862	3540		609	96	106		5868	16697		0.501	0.584		3585	4759		0.951397	0.958919		0.196397	-0.17779		27.57	106.28
		50.8	2.2		12391	17960	18901	12244		10464	4591	3621		517	82	90		15943	12174		0.825	0.962		1790	2377		0.922766	0.973484		0.202431	-0.1922		48.78	68.96
		62.1	2.6		12442	17087	17159	11232		12099	4445	4329		528	83	91		8309	14841		0.748	0.873		15002	19914		0.943886	0.982717		0.226603	-0.16048		36.1	112.77
		45.7	2.1		12752	15462	17617	13692		10964	3990	4456		547	87	95		8866	7912		0.748	0.873		8151	10820		0.8393	0.964507		0.195056	-0.17034		24.02	153.75
		50.4	2.3		12114	17121	16736	12391		9071	4033	3401		568	93	85		9576	22098		0.856	0.835		21777	28908		0.942955	0.919026		0.213462	-0.16259		50.39	100.47
		42.9	2		13262	16660	18321	13084		11566	4231	3841						12206	9269		0.711	0.829		7088	9408		0.932446	0.984061		0.235234	-0.17166		86.99	63.01
		46.4	2.1		12411	17170	17317	12284										9511	18701		0.811	0.946		5064	6722		0.918223	0.875302		0.203768	-0.14516		84.39	75.09
																		6686	12705		0.651	0.759		12759	16937		0.862057	0.910636		0.230442	-0.14794		32.54	61.35
																		14002	6778		0.797	0.93		16912	22450		0.935642	0.937696		0.241719	-0.15946		71.56	84.03
																		7224	8940		0.76	0.886		2784	3696		0.924209	0.986852		0.263636	-0.12462		64.32	117.23
																		7916	11045		0.88	0.898		7054	9363		0.883345	0.980411		0.280445	-0.13299		37.4	146.38
																		8915	13645		0.781	0.911		25876	34349		0.867636	0.968684		0.287467	-0.12634		26.27	104.47
																		7531	20405		0.732	0.854		31078	41254		0.90973	0.949929		0.292361	0.092503		47.26	108.39
																		8761	16454		0.721	0.841		18583	24668		0.938595	0.96203		0.298438	-0.08194		45.37	104.06
																		5917	10916		0.796	0.929		8231	10926		0.878908	0.932477		0.329283	-0.04752		63.48	99.72
																		6763	10289		0.587	0.685		15953	21177		0.859325	0.945262		0.293153	0.035202		39.7	91.05
																		7378	11795		0.791	0.785		7606	10096		0.919665	0.931682		0.335768	-0.02084		49.62	113.81
																		8069	12924		0.635	0.697		4825	6405		0.956035	0.945832		0.335981	-0.02197		59.26	188.09
																		8530	14555		0.778	0.669		9768	12967		0.93832	0.954803		0.329896	-0.17754		56.78	128.53
																		8792	12296		0.741	0.639		10984	14581		0.894074	0.937111		0.361149	-0.05694		41.31	94.04
																		9591	14304		0.751	0.555		16477	21872		0.957343	0.892922		0.321559	-0.01967		49.58	78.37
																		10490	9661		0.762	0.914		12412	16477		0.851537	0.95611		0.375133	-0.03425		33.88	172.41
																		11089	12045		0.714	0.829		15378	20413		0.960058	0.911061		0.386836	-0.01577		18.92	183.39
																		9469.85	12388.2		0.703	0.829		8788	11665		0.953792	0.958821		0.445989	-0.02647		36.36	18.38
																		10416.8	13627		0.777	0.794		14609	19393		0.942383	0.952563		0.463012	-0.01323		45.44	22.05
																		12310.8	16104.6		0.573	0.788		10782	14312		0.924138	0.941169		0.478545	0.088201		28.34	75.07
																		14204.8	18582.2		0.657	0.899		16173	21469		0.946482	0.922947		0.155578	0.179531		45.81	56.72

[truncated: 6 more sheets: Figure 5 - figure supplement 1, Figure 5 - figure supplement 2, Figure 6, Figure 6 - figure supplement 1 , Figure 7, Figure 8]
